# Supplementary material for: Extended Spectrum Beta-Lactamase-Resistant Determinants among Carbapenem-Resistant Enterobacteriaceae from Beef Cattle in the North West Province, South Africa: A Critical Assessment of Their Possible Public Health Implications
Source: PubMed Central journal article supplement (PMC7698526; doi:10.3390/antibiotics9110820), 2020-11-17
Supplement: antibiotics-09-00820-s001.pdf [file antibiotics-09-00820-s001.pdf]

Article

# Extended Spectrum Beta-Lactamase-Resistant Determinants among Carbapenem-Resistant *Enterobacteriaceae* from Beef Cattle in the North West Province, South Africa: A Critical Assessment of Their Possible Public Health Implications

Lungisile Tshitshi <sup>1,2</sup>, Madira Coutlyne Manganyi <sup>3</sup>, Peter Kotsoana Montso <sup>4</sup>, Moses Mbewe <sup>2</sup> and Collins Njie Ateba <sup>1,4,\*</sup>

<sup>1</sup> Antimicrobial Resistance and Phage Biocontrol Research Group, Department of Microbiology, School of Biological Sciences, Faculty of Natural and Agricultural Sciences, North West University, Private Bag X2046, Mmabatho 2735, South Africa; Lungisile.Tshitshi@ump.ac.za

<sup>2</sup> Faculty of Agriculture and Natural Sciences, University of Mpumalanga, Private Bag X11283, Mbombela 1200, South Africa; Moses.Mbewe@ump.ac.za

<sup>3</sup> Unit for Environmental Sciences and Management, North-West University, Potchefstroom 2520, South Africa; madira.manganyi@nwu.ac.za

<sup>4</sup> Food Security and Safety Niche Area, Faculty of Natural and Agricultural Sciences, North West University, Private Bag X2046, Mmabatho 2735, South Africa; montsokp@gmail.com

\* Correspondence: collins.ateba@nwu.ac.za.

**Table S1.** Multidrug resistance phenotypes and MAR index of CRE isolates.

| Antibiotypes | Multidrug Resistance Phenotypes | Number of Isolates | Number of Antibiotics | MAR Index |
|--------------|---------------------------------|--------------------|-----------------------|-----------|
| AB_1         | ATM-CTX-FOX                     | 1                  | 3                     | 0.23      |
| AB_2         | A-KF-CAZ                        | 2                  | 3                     | 0.23      |
| AB_3         | CPM-EFT-CTX                     | 1                  | 3                     | 0.23      |
| AB_4         | ATM-EFT-CAZ                     | 1                  | 3                     | 0.23      |
| AB_5         | CPM-ATM-TC                      | 1                  | 3                     | 0.23      |
| AB_6         | ATM-A-CIP                       | 1                  | 3                     | 0.23      |
| AB_7         | CXM-PRL-CTX                     | 2                  | 3                     | 0.23      |
| AB_8         | A-KF-FOX                        | 2                  | 3                     | 0.23      |
| AB_9         | PRL-CTX-CAZ                     | 2                  | 3                     | 0.23      |
| AB_10        | CXM-ATM-KF-CTX                  | 1                  | 4                     | 0.31      |
| AB_11        | EFT-CTX-FOX-AMP                 | 1                  | 4                     | 0.31      |
| AB_12        | CXM-ATM-A-CTX                   | 2                  | 4                     | 0.31      |
| AB_13        | CXM-PRL-KF-FOX                  | 1                  | 4                     | 0.31      |
| AB_14        | ATM-EFT-FOX-AMC                 | 1                  | 4                     | 0.31      |
| AB_15        | CPM-PRL-TC-CTX                  | 1                  | 4                     | 0.31      |
| AB_16        | EFT-CTX-CAZ-FOX                 | 2                  | 4                     | 0.31      |
| AB_17        | CXM-ATM-PRL-CTX                 | 1                  | 4                     | 0.31      |
| AB_18        | CXM-ATM-CTX-CAZ                 | 1                  | 4                     | 0.31      |
| AB_19        | CPM-ATM-KF-FOX                  | 1                  | 4                     | 0.31      |
| AB_20        | ATM-A-TC-CTX                    | 1                  | 4                     | 0.31      |
| AB_21        | EFT-A-KF-FOX                    | 1                  | 4                     | 0.31      |
| AB_22        | CPM-ATM-EFT-CTX                 | 1                  | 4                     | 0.31      |

|       |                     |   |   |      |
|-------|---------------------|---|---|------|
| AB_23 | CXM-ATM-PRL-CIP     | 1 | 4 | 0.31 |
| AB_24 | CXM-ATM-CAZ-CIP     | 1 | 4 | 0.31 |
| AB_25 | CXM-ATM-EFT-TC      | 1 | 4 | 0.31 |
| AB_26 | ATM-TC-KF-FOX       | 1 | 4 | 0.31 |
| AB_27 | A-PRL-KF-FOX        | 1 | 4 | 0.31 |
| AB_28 | ATM-CTX-CAZ-CIP     | 1 | 4 | 0.31 |
| AB_29 | CXM-ATM-TC-CTX      | 1 | 4 | 0.31 |
| AB_30 | ATM-PRL-CTX-FOX     | 1 | 4 | 0.31 |
| AB_31 | CXM-CPM-TC-CTX      | 1 | 4 | 0.31 |
| AB_32 | PRL-CAZ-FOX-CIP     | 1 | 4 | 0.31 |
| AB_33 | CXM-ATM-FOX-CIP     | 1 | 4 | 0.31 |
| AB_34 | CXM-ATM-EFT-PRL     | 1 | 4 | 0.31 |
| AB_35 | ATM-EFT-PRL-AMC     | 1 | 4 | 0.31 |
| AB_36 | EFT-PRL-TC-FOX      | 1 | 4 | 0.31 |
| AB_37 | ATM-EFT-A-PRL       | 1 | 4 | 0.31 |
| AB_38 | EFT-A-KF-CAZ        | 1 | 4 | 0.31 |
| AB_39 | EFT-A-KF-CTX        | 1 | 4 | 0.31 |
| AB_40 | EFT-A-CTX-FOX       | 1 | 4 | 0.31 |
| AB_41 | EFT-TC-KF-FOX       | 1 | 4 | 0.31 |
| AB_42 | ATM-KF-CAZ-FOX      | 1 | 4 | 0.31 |
| AB_43 | EFT-CAZ-FOX-AMC     | 1 | 4 | 0.31 |
| AB_44 | CXM-KF-CTX-CAZ      | 1 | 4 | 0.31 |
| AB_45 | EFT-A-PRL-FOX       | 1 | 4 | 0.31 |
| AB_46 | CPM-ATM-EFT-CTX-FOX | 1 | 5 | 0.38 |
| AB_47 | CXM-ATM-EFT-CTX-FOX | 1 | 5 | 0.38 |
| AB_48 | EFT-A-PRL-KF-CTX    | 1 | 5 | 0.38 |
| AB_49 | CXM-ATM-PRL-TC-CTX  | 5 | 5 | 0.38 |
| AB_50 | CXM-CPM-PRL-CTX-CAZ | 1 | 5 | 0.38 |
| AB_51 | CXM-CPM-ATM-CAZ-FOX | 1 | 5 | 0.38 |
| AB_52 | CXM-PRL-TC-CTX-CAZ  | 1 | 5 | 0.38 |
| AB_53 | EFT-PRL-TC-CTX-CAZ  | 1 | 5 | 0.38 |
| AB_54 | CXM-PRL-KF-CTX-CAZ  | 1 | 5 | 0.38 |
| AB_55 | ATM-EFT-A-TC-CTX    | 1 | 5 | 0.38 |
| AB_56 | ATM-TC-KF-CTX-CIP   | 1 | 5 | 0.38 |
| AB_57 | CXM-EFT-PRL-TC-CTX  | 1 | 5 | 0.38 |
| AB_58 | CXM-CPM-A-PRL-CAZ   | 1 | 5 | 0.38 |
| AB_59 | CXM-EFT-A-KF-FOX    | 1 | 5 | 0.38 |
| AB_60 | EFT-A-TC-KF-FOX     | 2 | 5 | 0.38 |
| AB_61 | CXM-ATM-EFT-KF-FOX  | 1 | 5 | 0.38 |
| AB_62 | ATM-TC-KF-CTX-FOX   | 1 | 5 | 0.38 |
| AB_63 | CXM-ATM-TC-KF-FOX   | 1 | 5 | 0.38 |
| AB_64 | ATM-A-PRL-CAZ-FOX   | 1 | 5 | 0.38 |
| AB_65 | CXM-PRL-TC-CAZ-ATM  | 1 | 5 | 0.38 |
| AB_66 | EFT-A-PRL-TC-KF     | 1 | 5 | 0.38 |
| AB_67 | ATM-EFT-TC-KF-CTX   | 1 | 5 | 0.38 |
| AB_68 | CXM-EFT-A-TC-CTX    | 1 | 5 | 0.38 |
| AB_69 | EFT-A-PRL-CTX-AMC   | 1 | 5 | 0.38 |
| AB_70 | ATM-A-CTX-FOX-CIP   | 1 | 5 | 0.38 |
| AB_71 | ATM-TC-CTX-AMC-AMC  | 1 | 5 | 0.38 |
| AB_72 | ATM-EFT-PRL-TC-AMC  | 1 | 5 | 0.38 |

|        |                           |   |   |      |
|--------|---------------------------|---|---|------|
| AB_73  | CXM-ATM-TC-KF-CTX         | 1 | 5 | 0.38 |
| AB_74  | CXM-ATM-A-KF-AMC          | 1 | 5 | 0.38 |
| AB_75  | A-PRL-TC-KF-CAZ           | 1 | 5 | 0.38 |
| AB_76  | A-PRL-TC-K-CAZ            | 1 | 5 | 0.38 |
| AB_77  | CXM-EFT-A-TC-FOX          | 1 | 5 | 0.38 |
| AB_78  | A-KF-CTX-CAZ-FOX          | 1 | 5 | 0.38 |
| AB_79  | CXM-CPM-EFT-A-CTX-CAZ     | 1 | 6 | 0.46 |
| AB_80  | CXM-ATM-EFT-CTX-CAZ-FOX   | 1 | 6 | 0.46 |
| AB_81  | CPM-A-PRL-TC-CTX-CAZ      | 1 | 6 | 0.46 |
| AB_82  | CPM-A-PRL-CTX-CAZ-FOX     | 1 | 6 | 0.46 |
| AB_83  | CXM-EFT-A-PRL-CTX-CAZ     | 1 | 6 | 0.46 |
| AB_84  | CXM-EFT-PRL-TC-KF-CAZ     | 1 | 6 | 0.46 |
| AB_85  | CXM-CPM-CTX-CAZ-FOX-CIP   | 1 | 6 | 0.46 |
| AB_86  | CPM-EFT-A-PRL-CTX-CAZ     | 1 | 6 | 0.46 |
| AB_87  | CPM-ATM-PRL-CTX-CAZ-FOX   | 1 | 6 | 0.46 |
| AB_88  | CXM-ATM-KF-CTX-CAZ-FOX    | 1 | 6 | 0.46 |
| AB_89  | ATM-PRL-CTX-CAZ-CIP-AMC   | 1 | 6 | 0.46 |
| AB_90  | ATM-EFT-PRL-KF-FOX-CIP    | 1 | 6 | 0.46 |
| AB_91  | CXM-ATM-PRL-CTM-FOX-CIP   | 1 | 6 | 0.46 |
| AB_92  | ATM-A-PRL-TC-CTX-CAZ      | 1 | 6 | 0.46 |
| AB_93  | ATM-PRL-TC-KF-CTX-CIP     | 1 | 6 | 0.46 |
| AB_94  | CXM-CPM-ATM-A-TC-CTX      | 1 | 6 | 0.46 |
| AB_95  | CXM-CPM-ATM-A-CAZ-FOX     | 1 | 6 | 0.46 |
| AB_96  | CXM-CPM-ATM-PRL-KF-CTX    | 1 | 6 | 0.46 |
| AB_97  | CPM-ATM-EFT-KF-CAZ-FOX    | 1 | 6 | 0.46 |
| AB_98  | CPM-ATM-KF-CTX-CAZ-FOX    | 1 | 6 | 0.46 |
| AB_99  | ATM-TC-KF-CTX-CAZ-FOX     | 1 | 6 | 0.46 |
| AB_100 | CXM-A-TC-CTX-CAZ-FOX      | 1 | 6 | 0.46 |
| AB_101 | CXM-ATM-A-PRL-TC-FOX      | 1 | 6 | 0.46 |
| AB_102 | CXM-ATM-A-PRL-KF-CTX      | 1 | 6 | 0.46 |
| AB_103 | CXM-ATM-EFT-TC-CTX-FOX    | 1 | 6 | 0.46 |
| AB_104 | EFT-A-PRL-TC-KF-CAZ       | 1 | 6 | 0.46 |
| AB_105 | CXM-ATM-EFT-A-KF-CAZ      | 1 | 6 | 0.46 |
| AB_106 | EFT-PRL-TC-KF-CTX-CAZ     | 1 | 6 | 0.46 |
| AB_107 | ATM-EFT-TC-KF-CTX-CAZ     | 1 | 6 | 0.46 |
| AB_108 | CXM-EFT-A-CTX-FOX-CIP     | 1 | 6 | 0.46 |
| AB_109 | A-PRL-KF-CTX-CAZ-FOX      | 1 | 6 | 0.46 |
| AB_110 | CXM-PRL-TC-KF-CTX-CAZ-AMC | 1 | 7 | 0.54 |
| AB_111 | ATM-EFT-A-PRL-TC-CTX-FOX  | 1 | 7 | 0.54 |
| AB_112 | CPM-EFT-A-PRL-KF-CTX-FOX  | 1 | 7 | 0.54 |

|        |                                  |   |   |      |
|--------|----------------------------------|---|---|------|
| AB_113 | CXM-CPM-ATM-A-TC-CTX-CIP         | 1 | 7 | 0.54 |
| AB_114 | CXM-CPM-ATM-EFT-PRL-CTX-FOX      | 1 | 7 | 0.54 |
| AB_115 | CXM-EFT-A-KF-CTX-CAZ-FOX         | 2 | 7 | 0.54 |
| AB_116 | CXM-ATM-EFT-A-PRL-KF-FOX         | 1 | 7 | 0.54 |
| AB_117 | CXM-ATM-KF-CTX-CAZ-FOX-CIP       | 1 | 7 | 0.54 |
| AB_118 | CXM-ATM-EFT-TC-KF-CAZ-FOX        | 1 | 7 | 0.54 |
| AB_119 | CXM-ATM-PRL-TC-KF-CTX-CAZ        | 1 | 7 | 0.54 |
| AB_120 | CPM-ATM-PRL-TC-KF-CTX-FOX        | 1 | 7 | 0.54 |
| AB_121 | ATM-A-PRL-KF-CTX-FOX-AMC         | 1 | 7 | 0.54 |
| AB_122 | CXM-CPM-ATM-PRL-TC-CTX-FOX       | 1 | 7 | 0.54 |
| AB_123 | CXM-EFT-A-PRL-KF-CAZ-CIP         | 1 | 7 | 0.54 |
| AB_124 | CXM-ATM-EFT-A-CTX-CIP-AMC        | 1 | 7 | 0.54 |
| AB_125 | CXM-ATM-EFT-A-TC-KF-CTX          | 1 | 7 | 0.54 |
| AB_126 | CXM-EFT-A-TC-KF-CTX-FOX-AMC      | 1 | 8 | 0.62 |
| AB_127 | CXM-CPM-ATM-A-PRL-TC-CTX-CAZ     | 1 | 8 | 0.62 |
| AB_128 | CXM-CPM-ATM-EFT-A-TC-KF-CTX      | 1 | 9 | 0.69 |
| AB_139 | CXM-CPM-ATM-A-PRL-TC-CTX-CAZ-FOX | 1 | 9 | 0.69 |

MAR = Multi antibiotic resistance A = Amoxicillin, AMC = Amoxicillin-clavulanate, ATM = Aztreonam, CPM = Cefepime, CTX = Cefotaxime, FOX = Cefoxitin, CAZ = Ceftazidime, CXM = Cefuroxime, EFT = Ceftiofur, KF = Cephalothin, CIP = Ciprofloxacin, PRL = Piperacillin and TC = Ticarcillin; .Average MAR index = 0.40.
